# Supplementary material
Source: publisher site journal article supplement (https://www.dovepress.com/article/323743)

**Supplementary materials**

**Supplementary Tables**

**Table S1. Clinical information of HCC patients in the TCGA and GSE14520 cohorts**

| Category | Subcategory | TCGA (n = 370) | GSE14520 (n=221) |
| --- | --- | --- | --- |
| Age, years | ≤ 50 | 78 | 112 |
|  | > 50 | 292 | 109 |
| Gender | Female | 121 | 30 |
|  | Male | 249 | 191 |
| Viral hepatitis | No | 198 | NA |
|  | Hepatitis B | 97 | NA |
|  | Hepatitis C | 49 | NA |
|  | Hepatitis B+C | 7 | NA |
|  | Unknown | 19 | NA |
| AFP, ng/ml | ≤ 200 | 201 | 118 (≤ 300ng/ml) |
|  | >200 | 76 | 100 (> 300 ng/ml) |
|  | Unknown | 93 | 3 |
| Vascular invasion | No | 206 | NA |
|  | Micro | 92 | NA |
|  | Macro | 16 | NA |
|  | Unknown | 56 | NA |
| Pathological grade | G1 | 55 | NA |
|  | G2 | 177 | NA |
|  | G3 | 121 | NA |
|  | G4 | 12 | NA |
|  | Unknown | 5 | NA |
| Clinical stage | I | 171 | 93 |
|  | II | 85 | 77 |
|  | III | 85 | 49 |
|  | IV | 5 | 0 |
|  | Unknown | 24 | 2 |
| Tumor diameter, cm | ≤ 5 | NA | 140 |
|  | >5 | NA | 80 |
|  | Unknown | NA | 1 |
| Tumor number | Single | NA | 176 |
|  | Multiple | NA | 45 |

AFP, alpha-fetoprotein; NA, not available.

**Table S2. The 15 human AKR superfamily members**

| Gene | Protein |
| --- | --- |
| AKR1A1 | Aldehyde Reductase |
| AKR1B1 | Aldose Reductase |
| AKR1B10 | Aldose Reductase |
| AKR1B15 | Aldose Reductase (3-Keto-acyl CoA reductase) |
| AKR1C1 | 20a-Hydroxysteroid Dehydrogenase (20a-HSD) |
| AKR1C2 | Type 3 3a-HSD |
| AKR1C3 | Type 5 17b-HSD |
| AKR1C4 | Type 1 3a-HSD |
| AKR1D1 | Steroid 5b-Reductase |
| AKR1E2 | 1,5-Andyro-D-fructose reductase |
| AKR6A3 | Potassium voltage gated channel, b-subunit -1 |
| AKR6A5 | Potassium voltage gated channel, b-subunit -2 |
| AKR6A9 | Potassium voltage gated channel, b-subunit -3 |
| AKR7A2 | Aflatoxin aldehyde reductase |
| AKR7A3 | Aflatoxin aldehyde reductase |

**Table S3. Differentially expressed** **cancer-related transcriptional factors in HCC**

| Gene | N | T | LogFC | p | FDR |
| --- | --- | --- | --- | --- | --- |
| ARID3A | 0.294382 | 2.813732 | 3.256725 | 2.49E-18 | 1.06E-17 |
| ATF3 | 20.57439 | 9.029725 | -1.1881 | 1.07E-11 | 2.36E-11 |
| BACH2 | 0.544551 | 0.269844 | -1.01294 | 4.58E-09 | 8.30E-09 |
| BATF | 1.718081 | 5.008611 | 1.543613 | 0.000362 | 0.000472 |
| BRCA1 | 0.351409 | 0.995991 | 1.502983 | 5.86E-12 | 1.35E-11 |
| BRF2 | 0.757303 | 1.653822 | 1.126861 | 2.05E-14 | 5.65E-14 |
| CBX2 | 0.096339 | 1.060127 | 3.45998 | 2.15E-24 | 3.14E-23 |
| CBX3 | 9.297276 | 21.6849 | 1.221811 | 2.24E-25 | 5.45E-24 |
| CBX5 | 1.577546 | 3.678335 | 1.22137 | 1.27E-15 | 3.90E-15 |
| CBX8 | 0.766471 | 2.805325 | 1.871865 | 3.25E-27 | 1.36E-25 |
| CDK2 | 2.471469 | 5.171433 | 1.065195 | 8.63E-12 | 1.94E-11 |
| CDK7 | 2.661563 | 6.096758 | 1.195768 | 4.38E-25 | 8.30E-24 |
| CDX2 | 0.023793 | 0.105574 | 2.149646 | 1.81E-07 | 2.96E-07 |
| CEBPA | 28.66673 | 70.49494 | 1.298142 | 2.30E-10 | 4.63E-10 |
| CENPA | 0.061506 | 1.822941 | 4.889403 | 1.73E-27 | 8.41E-26 |
| CHD7 | 0.515005 | 1.138924 | 1.145013 | 2.61E-12 | 6.10E-12 |
| CIITA | 0.380109 | 0.798406 | 1.070709 | 1.61E-05 | 2.29E-05 |
| DNMT1 | 1.168587 | 4.380206 | 1.906233 | 7.50E-21 | 4.21E-20 |
| DNMT3A | 0.555289 | 2.215352 | 1.996224 | 7.94E-24 | 8.92E-23 |
| E2F1 | 0.445127 | 9.101468 | 4.35381 | 1.32E-27 | 7.71E-26 |
| E2F3 | 1.054377 | 2.818841 | 1.418712 | 2.54E-13 | 6.39E-13 |
| E2F4 | 4.035537 | 9.315703 | 1.206904 | 1.27E-22 | 9.50E-22 |
| E2F7 | 0.018296 | 0.356784 | 4.285471 | 2.60E-24 | 3.61E-23 |
| EBF1 | 0.093448 | 0.6627 | 2.826119 | 4.55E-25 | 8.30E-24 |
| EED | 0.707357 | 1.688835 | 1.255517 | 1.10E-24 | 1.69E-23 |
| EGR1 | 126.0517 | 32.6503 | -1.94885 | 4.40E-19 | 2.14E-18 |
| EGR2 | 2.84593 | 0.810376 | -1.81224 | 1.71E-15 | 5.10E-15 |
| EHF | 0.417752 | 2.063035 | 2.304048 | 0.0108 | 0.012864 |
| EHMT2 | 1.91356 | 7.718972 | 2.01215 | 4.23E-28 | 4.47E-26 |
| ELK4 | 2.141748 | 4.329982 | 1.015573 | 5.00E-14 | 1.33E-13 |
| EMX1 | 0.014915 | 0.352509 | 4.562804 | 4.54E-10 | 8.96E-10 |
| EP400 | 0.736775 | 1.639009 | 1.153527 | 1.31E-18 | 5.89E-18 |
| ESR1 | 2.143048 | 0.557843 | -1.94173 | 1.04E-22 | 8.03E-22 |
| EZH1 | 1.219433 | 3.030827 | 1.313501 | 7.55E-24 | 8.92E-23 |
| EZH2 | 0.342823 | 2.947812 | 3.104109 | 4.59E-28 | 4.47E-26 |
| FOS | 113.2005 | 21.1632 | -2.41925 | 6.68E-21 | 3.90E-20 |
| FOXK1 | 0.443208 | 1.688212 | 1.929439 | 7.21E-25 | 1.17E-23 |
| FOXM1 | 0.191186 | 3.995444 | 4.385308 | 4.85E-27 | 1.44E-25 |
| FOXO1 | 9.479037 | 4.497195 | -1.07571 | 4.28E-15 | 1.21E-14 |
| GATA2 | 0.27861 | 0.604174 | 1.116715 | 3.29E-05 | 4.59E-05 |
| GATAD1 | 3.076172 | 6.737563 | 1.13109 | 3.23E-21 | 2.01E-20 |
| GREB1 | 0.300429 | 1.315273 | 2.130265 | 8.75E-05 | 0.000118 |
| HCFC1 | 2.658535 | 6.893584 | 1.374623 | 4.46E-24 | 5.93E-23 |
| HDAC1 | 9.672532 | 19.69688 | 1.026001 | 6.77E-19 | 3.14E-18 |
| HEY1 | 0.483479 | 1.989886 | 2.041161 | 9.46E-22 | 6.14E-21 |
| HOXA9 | 0.005737 | 0.059142 | 3.365883 | 1.58E-09 | 2.94E-09 |
| HOXB13 | 0.002392 | 0.30436 | 6.991439 | 3.68E-07 | 5.83E-07 |
| HOXB7 | 0.218899 | 1.170992 | 2.419392 | 3.55E-09 | 6.49E-09 |
| HOXC9 | 0.004654 | 0.492743 | 6.726338 | 3.78E-11 | 8.11E-11 |
| HSF1 | 6.466392 | 17.74508 | 1.456387 | 3.17E-25 | 7.13E-24 |
| HSF2 | 1.065538 | 2.610743 | 1.292878 | 2.69E-18 | 1.12E-17 |
| IRF3 | 6.185635 | 15.88715 | 1.360867 | 9.34E-24 | 9.74E-23 |
| IRF5 | 1.171044 | 2.776181 | 1.245307 | 4.35E-17 | 1.59E-16 |
| JARID2 | 1.051544 | 2.258196 | 1.102662 | 6.82E-16 | 2.14E-15 |
| JMJD6 | 1.873647 | 4.028999 | 1.104572 | 4.13E-17 | 1.53E-16 |
| KDM1A | 3.542355 | 7.089259 | 1.000926 | 5.94E-22 | 4.03E-21 |
| KDM5B | 0.982587 | 2.729211 | 1.473827 | 1.38E-16 | 4.73E-16 |
| KDM5C | 3.771043 | 7.552495 | 1.00199 | 2.49E-15 | 7.35E-15 |
| LEF1 | 0.118922 | 1.409514 | 3.567111 | 3.47E-17 | 1.30E-16 |
| LIN9 | 0.212697 | 1.048288 | 2.301167 | 1.07E-23 | 1.08E-22 |
| LMNA | 21.41802 | 59.00949 | 1.462122 | 2.92E-23 | 2.54E-22 |
| LMNB1 | 1.783776 | 7.208044 | 2.014673 | 3.52E-15 | 1.02E-14 |
| MAZ | 4.084353 | 11.38793 | 1.479326 | 7.22E-20 | 3.76E-19 |
| MED12 | 1.577755 | 3.922018 | 1.313723 | 2.94E-18 | 1.21E-17 |
| MEF2B | 0.052355 | 0.174933 | 1.740407 | 3.55E-15 | 1.02E-14 |
| MYB | 0.046398 | 0.13344 | 1.524058 | 7.29E-08 | 1.23E-07 |
| MYBL2 | 0.234586 | 9.274923 | 5.305148 | 3.92E-27 | 1.43E-25 |
| NCAPG | 0.096034 | 2.24796 | 4.54893 | 7.79E-28 | 5.69E-26 |
| NCOR2 | 2.598879 | 6.154784 | 1.243819 | 1.06E-19 | 5.43E-19 |
| NFYA | 2.440791 | 6.137549 | 1.330314 | 5.49E-19 | 2.63E-18 |
| NR2C2 | 0.656027 | 1.528133 | 1.219943 | 2.68E-12 | 6.21E-12 |
| NR4A1 | 9.32936 | 3.261308 | -1.51633 | 3.37E-14 | 9.10E-14 |
| NRF1 | 1.260008 | 2.555016 | 1.019899 | 3.77E-22 | 2.68E-21 |
| OGT | 2.905402 | 7.520328 | 1.372058 | 5.94E-21 | 3.54E-20 |
| PML | 1.502347 | 3.136546 | 1.061959 | 9.29E-18 | 3.57E-17 |
| POLR3A | 1.148312 | 2.37279 | 1.04707 | 7.34E-23 | 5.95E-22 |
| POLR3G | 0.274111 | 0.623002 | 1.184477 | 3.97E-13 | 9.74E-13 |
| POU2F1 | 0.502764 | 1.07292 | 1.09359 | 6.13E-19 | 2.89E-18 |
| POU5F1 | 0.115606 | 0.753411 | 2.704226 | 3.69E-18 | 1.49E-17 |
| PPARD | 3.899033 | 8.030164 | 1.042313 | 1.51E-11 | 3.32E-11 |
| PPARG | 2.18644 | 5.051845 | 1.208227 | 6.56E-11 | 1.38E-10 |
| PRKDC | 2.403593 | 6.866926 | 1.514472 | 2.87E-20 | 1.58E-19 |
| RARG | 0.609254 | 1.273798 | 1.064021 | 1.02E-07 | 1.71E-07 |
| RBP2 | 0.045158 | 1.429811 | 4.984714 | 4.18E-05 | 5.75E-05 |
| RFX5 | 2.269066 | 7.972019 | 1.812846 | 2.23E-23 | 2.03E-22 |
| RING1 | 14.73442 | 31.0202 | 1.074018 | 6.73E-23 | 5.62E-22 |
| SAP30 | 1.567784 | 3.84124 | 1.292846 | 1.01E-17 | 3.84E-17 |
| SCML2 | 0.206854 | 0.870754 | 2.073651 | 1.51E-18 | 6.68E-18 |
| SETDB1 | 1.745935 | 4.836078 | 1.469838 | 6.34E-25 | 1.09E-23 |
| SIRT6 | 2.380424 | 5.755776 | 1.273792 | 1.63E-23 | 1.54E-22 |
| SIX5 | 1.171547 | 2.626204 | 1.164564 | 3.79E-16 | 1.22E-15 |
| SMAD2 | 0.589431 | 1.22401 | 1.05422 | 5.27E-22 | 3.66E-21 |
| SMAD3 | 2.665888 | 5.688797 | 1.093508 | 8.62E-13 | 2.08E-12 |
| SMARCA4 | 2.346068 | 7.314386 | 1.640492 | 4.92E-27 | 1.44E-25 |
| SMARCB1 | 9.269228 | 20.46794 | 1.142845 | 8.60E-22 | 5.71E-21 |
| SMARCC1 | 3.640795 | 8.213944 | 1.173822 | 2.88E-19 | 1.45E-18 |
| SMC3 | 4.295751 | 8.852352 | 1.04315 | 1.84E-12 | 4.32E-12 |
| SNAI2 | 1.697855 | 5.665735 | 1.73855 | 1.00E-06 | 1.54E-06 |
| SNAPC2 | 2.575532 | 5.788692 | 1.168367 | 1.52E-23 | 1.48E-22 |
| SOX2 | 0.019622 | 0.417033 | 4.409603 | 0.000866 | 0.001099 |
| SOX4 | 1.773997 | 7.173031 | 2.015579 | 3.10E-07 | 4.95E-07 |
| SOX9 | 2.544715 | 9.973123 | 1.970541 | 2.70E-06 | 4.01E-06 |
| SPDEF | 0.120001 | 1.444979 | 3.58993 | 0.038361 | 0.0441 |
| SRC | 1.47643 | 5.368635 | 1.862442 | 2.16E-10 | 4.37E-10 |
| SREBF2 | 9.442611 | 22.39019 | 1.245609 | 4.68E-17 | 1.69E-16 |
| SSRP1 | 7.627695 | 15.40985 | 1.014534 | 3.35E-21 | 2.04E-20 |
| SUMO2 | 13.86474 | 28.29764 | 1.029261 | 8.60E-23 | 6.79E-22 |
| SUPT5H | 6.670217 | 14.04481 | 1.074232 | 6.42E-27 | 1.70E-25 |
| TCF21 | 0.414143 | 0.196167 | -1.07805 | 1.62E-16 | 5.51E-16 |
| TCF7 | 0.705251 | 2.04917 | 1.538831 | 1.20E-06 | 1.82E-06 |
| TEAD4 | 0.934252 | 2.577608 | 1.464149 | 2.02E-07 | 3.25E-07 |
| TFAP2A | 0.039343 | 0.30778 | 2.967708 | 5.48E-08 | 9.36E-08 |
| TP63 | 0.032491 | 0.121942 | 1.908063 | 0.00237 | 0.002945 |
| TP73 | 0.030832 | 0.529801 | 4.102942 | 2.96E-23 | 2.54E-22 |
| TRIM28 | 17.86355 | 47.31064 | 1.405146 | 3.70E-25 | 7.72E-24 |
| TTF2 | 0.211691 | 0.707547 | 1.740866 | 4.62E-18 | 1.85E-17 |
| USF1 | 8.336946 | 22.847 | 1.454414 | 1.32E-28 | 3.86E-26 |
| VDR | 0.303731 | 0.895339 | 1.55964 | 1.87E-05 | 2.64E-05 |
| WDR5 | 5.35759 | 12.39753 | 1.210397 | 8.35E-24 | 9.03E-23 |
| ZBTB17 | 2.114374 | 4.381083 | 1.051057 | 7.65E-24 | 8.92E-23 |

**Abbreviation:** HCC, hepatocellular carcinoma.

**Table S4. Primer sequences of AKR genes**

| Gene | Primer | Sequence |
| --- | --- | --- |
| AKR1B10 | Forward | CTGAGCTATCTGGACGTCTATC |
|  | Reverse | TTGTTCAAGAGCTTCTCGATCT |
| AKR1D1 | Forward | TCAGAACCTAAATCGACCCCT |
|  | Reverse | TCCCCAACTTCGTGTTCATTTT |
| AKR7A3 | Forward | GGCCACACCGAGATAGACAC |
|  | Reverse | GGCTTCAGGGAGTTCCCAAA |
| β-actin | Forward | ACATCTGCTGGAAGGTGGAC |
|  | Reverse | GCACCCAGCACAATGAAGAT |

**Table S5. The baseline characteristics and clinical correlations with AKR in HCC sample by IHC**

| Category | All patients (n = 40) | AKR1D1 | | p | AKR1B10 | | p | AKR7A3 | | p |
| --- | --- | --- | --- | --- | --- | --- | --- | --- | --- | --- |
| Low | High | Low | High | Low | High |
| Age, years |  |  |  | 0.251 |  |  | 0.804 |  |  | 0.822 |
| ≤ 50 | 23 | 15 | 8 |  | 9 | 14 |  | 13 | 10 |  |
| > 50 | 17 | 8 | 9 |  | 6 | 11 |  | 9 | 8 |  |
| Gender |  |  |  | 0.634 |  |  | 1.000 |  |  | 1.000 |
| Female | 5 | 2 | 3 |  | 2 | 3 |  | 3 | 2 |  |
| Male | 35 | 21 | 14 |  | 13 | 22 |  | 19 | 16 |  |
| HBV infection |  |  |  | 0.113 |  |  | 0.224 |  |  | 0.105 |
| Absence | 7 | 2 | 5 |  | 1 | 6 |  | 6 | 1 |  |
| Present | 33 | 21 | 12 |  | 14 | 19 |  | 16 | 17 |  |
| Cirrhosis |  |  |  | 0.676 |  |  | 1.000 |  |  | 0.482 |
| Absence | 18 | 11 | 7 |  | 7 | 11 |  | 11 | 7 |  |
| Present | 22 | 12 | 10 |  | 8 | 14 |  | 11 | 11 |  |
| Tumor diameter, cm |  |  |  | 0.717 |  |  | 0.715 |  |  | 0.300 |
| ≤ 5 | 10 | 5 | 5 |  | 3 | 7 |  | 4 | 6 |  |
| > 5 | 30 | 18 | 12 |  | 12 | 18 |  | 18 | 12 |  |
| Tumor number |  |  |  | 0.153 |  |  | 1.000 |  |  | 0.286 |
| Single | 29 | 19 | 10 |  | 11 | 18 |  | 14 | 15 |  |
| Multiple | 11 | 4 | 7 |  | 4 | 7 |  | 8 | 3 |  |
| AFP, ng/ml |  |  |  | 0.471 |  |  | 0.269 |  |  | 0.464 |
| ≤ 200 | 30 | 16 | 14 |  | 13 | 17 |  | 15 | 15 |  |
| > 200 | 10 | 7 | 3 |  | 2 | 8 |  | 7 | 3 |  |
| Pathological differentiation |  |  |  | 0.707 |  |  | 1.000 |  |  | 0.476 |
| Low | 9 | 6 | 3 |  | 3 | 6 |  | 6 | 3 |  |
| High-Medium | 31 | 17 | 14 |  | 12 | 19 |  | 16 | 15 |  |
| BCLC stage |  |  |  | 0.037 |  |  | 0.283 |  |  | 0.385 |
| 0-I | 17 | 13 | 4 |  | 8 | 9 |  | 8 | 9 |  |
| II-III | 23 | 10 | 13 |  | 7 | 16 |  | 14 | 9 |  |
| Recurrence |  |  |  | 0.746 |  |  | 0.730 |  |  | 0.919 |
| No | 27 | 16 | 11 |  | 11 | 16 |  | 15 | 12 |  |
| Yes | 13 | 7 | 6 |  | 4 | 9 |  | 7 | 6 |  |
| Death |  |  |  | 1.000 |  |  | 1.000 |  |  | 1.000 |
| No | 38 | 22 | 16 |  | 14 | 24 |  | 21 | 17 |  |
| Yes | 2 | 1 | 1 |  | 1 | 1 |  | 1 | 1 |  |

**Abbreviations:** AFP, alpha-fetoprotein; BCLC, Barcelona Clinic Liver Cancer; HBV, hepatitis B virus; HCC, hepatocellular carcinoma; IHC, immunohistochemistry.

**Table S6. Correlations between AKR protein expressions and immune cells and checkpoint molecules in HCC samples by IHC**

| Category | All patients (n = 40) | AKR1D1 | | p | AKR1B10 | | p | AKR7A3 | | p |
| --- | --- | --- | --- | --- | --- | --- | --- | --- | --- | --- |
| Low | High | Low | High | Low | High |
| CD4 |  |  |  | 0.151 |  |  | 0.505 |  |  | 0.243 |
| Low | 16 | 7 | 9 |  | 5 | 11 |  | 7 | 9 |  |
| High | 24 | 16 | 8 |  | 10 | 14 |  | 15 | 9 |  |
| CD8 |  |  |  | 0.117 |  |  | 0.354 |  |  | 0.251 |
| Low | 25 | 12 | 13 |  | 8 | 17 |  | 12 | 13 |  |
| High | 15 | 11 | 4 |  | 7 | 8 |  | 10 | 5 |  |
| CD68 |  |  |  | 0.530 |  |  | 0.477 |  |  | 0.013 |
| Low | 12 | 6 | 6 |  | 3 | 9 |  | 3 | 9 |  |
| High | 28 | 17 | 11 |  | 12 | 16 |  | 19 | 9 |  |
| PD-1 |  |  |  | 0.079 |  |  | 0.273 |  |  | 0.286 |
| Low | 29 | 14 | 15 |  | 9 | 20 |  | 14 | 15 |  |
| High | 11 | 9 | 2 |  | 6 | 5 |  | 8 | 3 |  |
| CTLA4 |  |  |  | 0.634 |  |  | 0.633 |  |  | 0.642 |
| Low | 35 | 21 | 14 |  | 14 | 21 |  | 20 | 15 |  |
| High | 5 | 2 | 3 |  | 1 | 4 |  | 2 | 3 |  |
| TIM3 |  |  |  | 0.481 |  |  | 0.123 |  |  | 0.125 |
| Low | 26 | 6 | 10 |  | 12 | 14 |  | 12 | 14 |  |
| High | 14 | 7 | 7 |  | 3 | 11 |  | 10 | 4 |  |
| TIGIT |  |  |  | 0.433 |  |  | 0.505 |  |  | 0.897 |
| Low | 24 | 15 | 9 |  | 10 | 14 |  | 13 | 11 |  |
| High | 16 | 8 | 8 |  | 5 | 11 |  | 9 | 7 |  |

**Abbreviations:** HCC, hepatocellular carcinoma; IHC, immunohistochemistry.

**Supplementary figures**

**Supplementary figure legends**

**Figure S1** Prognostic analyses of the AKR-related risk model for various endpoints of HCC in the TCGA and GSE14520 cohorts. The Kaplan-Meier curves for DFI (**A**), DSS (**C**), PFI (**E**), and PFS (**G**) of HCC patients in the TCGA cohort. The ROC curves for 1-, 3-, and 5-year DFI (**B**), DSS (**D**), PFI (**F**), and PFS (**H**) of HCC patients in the TCGA cohort. (**I**) The Kaplan-Meier curve for RFS of HCC patients in the GSE14520 cohort. (**J**) The ROC curves for 1-, 3-, and 5-year RFS of HCC patients in the GSE14520 cohort.

**Abbreviations:** HCC, hepatocellular carcinoma; TCGA, the Cancer Genome Atlas; ROC, receiver operating characteristic; AUC, area under the curve; DSS, disease-specific survival, DFI, disease-free interval, PFI, progression-free interval, PFS, progression-free survival; RFS, recurrence-free survival.

**Figure S2** ROC analyses of the nomogram for predicting various endpoints of HCC in the TCGA and GSE14520 cohorts. The ROC curves of the nomogram for predicting the 1-, 3-, and 5-year DFI (**A**), DSS (**B**), PFI (**C**), and PFS (**D**) of HCC patients in the TCGA cohort. (**E**) The ROC curves of the nomogram for predicting the 1-, 3-, and 5-year RFS of HCC patients in the GSE14520 cohort.

**Abbreviations:** HCC, hepatocellular carcinoma; TCGA, the Cancer Genome Atlas; ROC, receiver operating characteristic; AUC, area under the curve; DSS, disease-specific survival, DFI, disease-free interval, PFI, progression-free interval, PFS, progression-free survival; RFS, recurrence-free survival.

**Figure S3** Correlation analyses of AKR genes expression (**A**) and risk scores (**B**) with various clinical factors of HCC in the GSE14520 cohort. ns p > 0.05, * p < 0.05, ** p < 0.01, *** p < 0.001.

**Abbreviations:** HCC, hepatocellular carcinoma; AFP, alpha-fetoprotein.

**Figure S4** Subgroup survival analyses on the OS of HCC with various clinical factors in the GSE14520 cohort. Kaplan-Meier curves for OS of HCC patients in different subgroups divided by (**A**) age (≤ 50/> 50 years), (**B)** gender (female/male), (**C**) AFP (≤ 300/> 300 ng/ml), (**D**) tumor diameter (≤ 5/> 5 cm), (**E**) tumor number (single/multiple), and (**F**) clinical stage (I-II/III-IV).

**Abbreviations:** HCC, hepatocellular carcinoma; OS, overall survival; AFP, alpha-fetoprotein.

**Figure S5** Sankey plot for the correlation of clinical factors, AKR members expression, and immune markers expression in HCC from our institution.

**Abbreviations:** HCC, hepatocellular carcinoma; AFP, alpha-fetoprotein; HBV, hepatitis B; BCLC, Barcelona Clinic Liver Cancer.

**Figure S1**


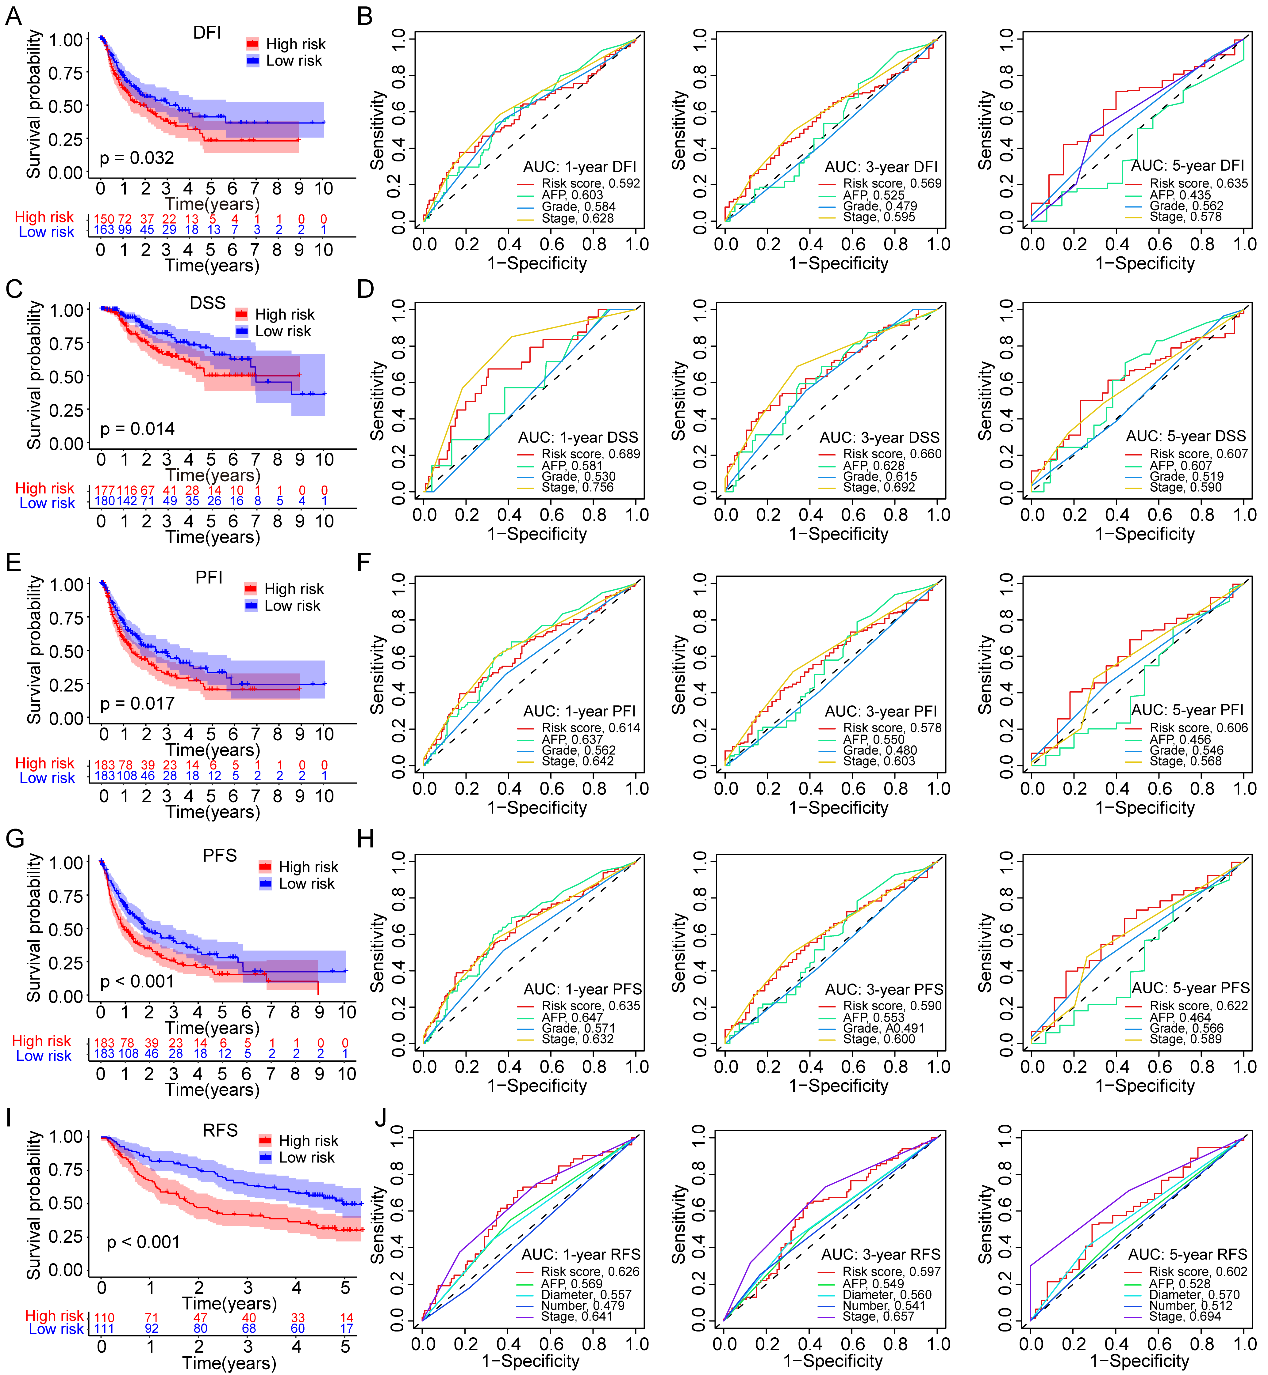


**Figure S2**


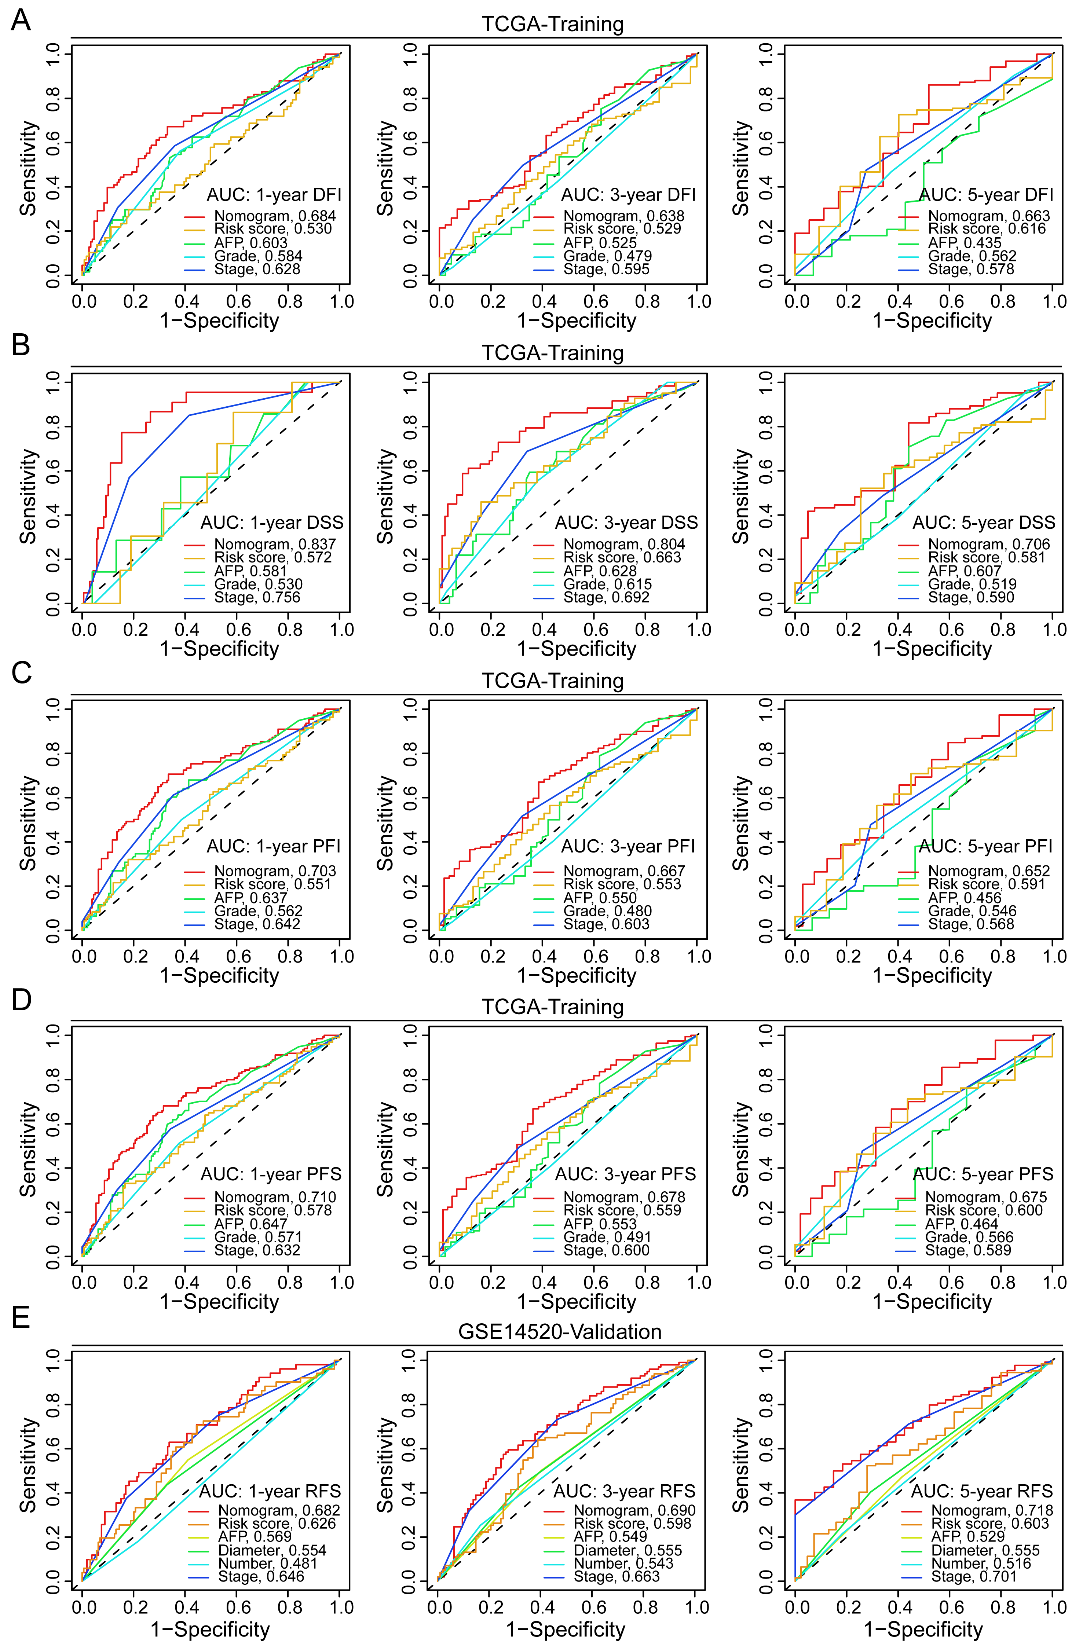


**Figure S3**


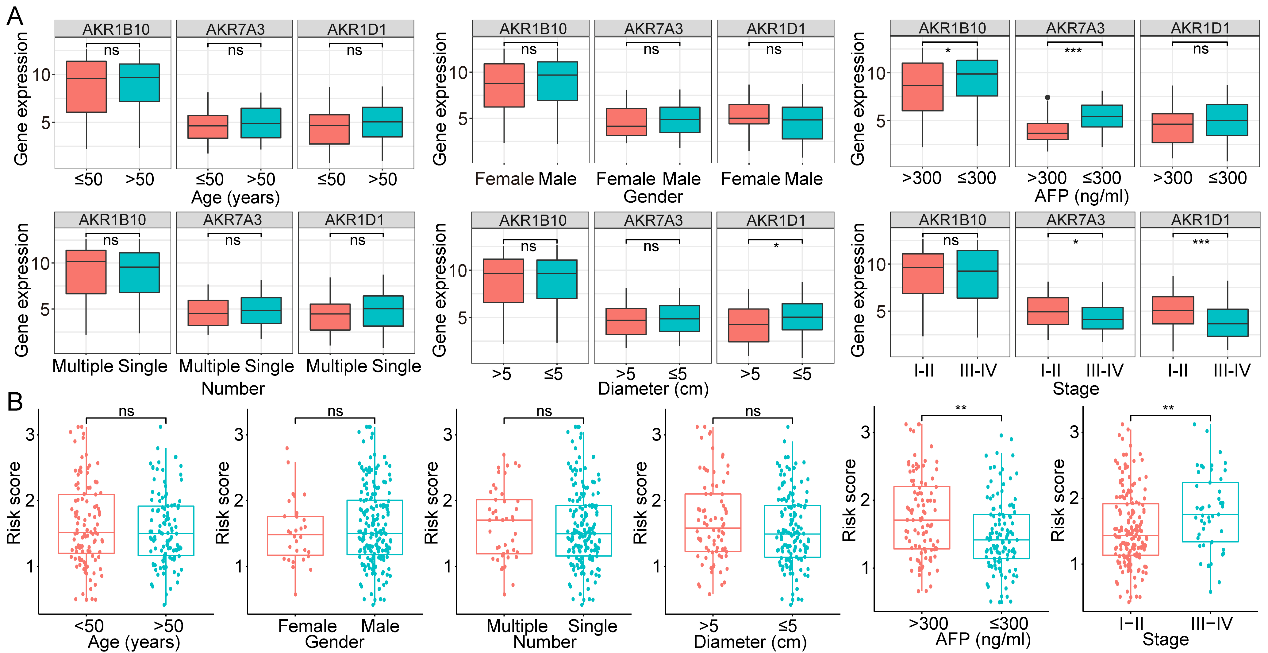


**Figure S4**


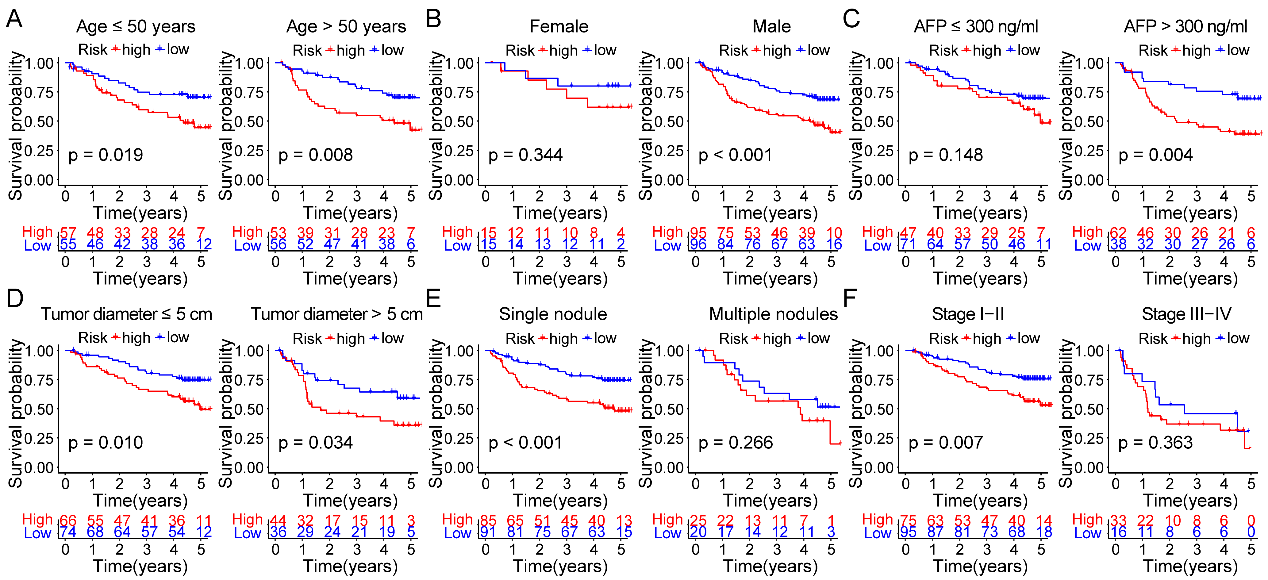


**Figure S5**


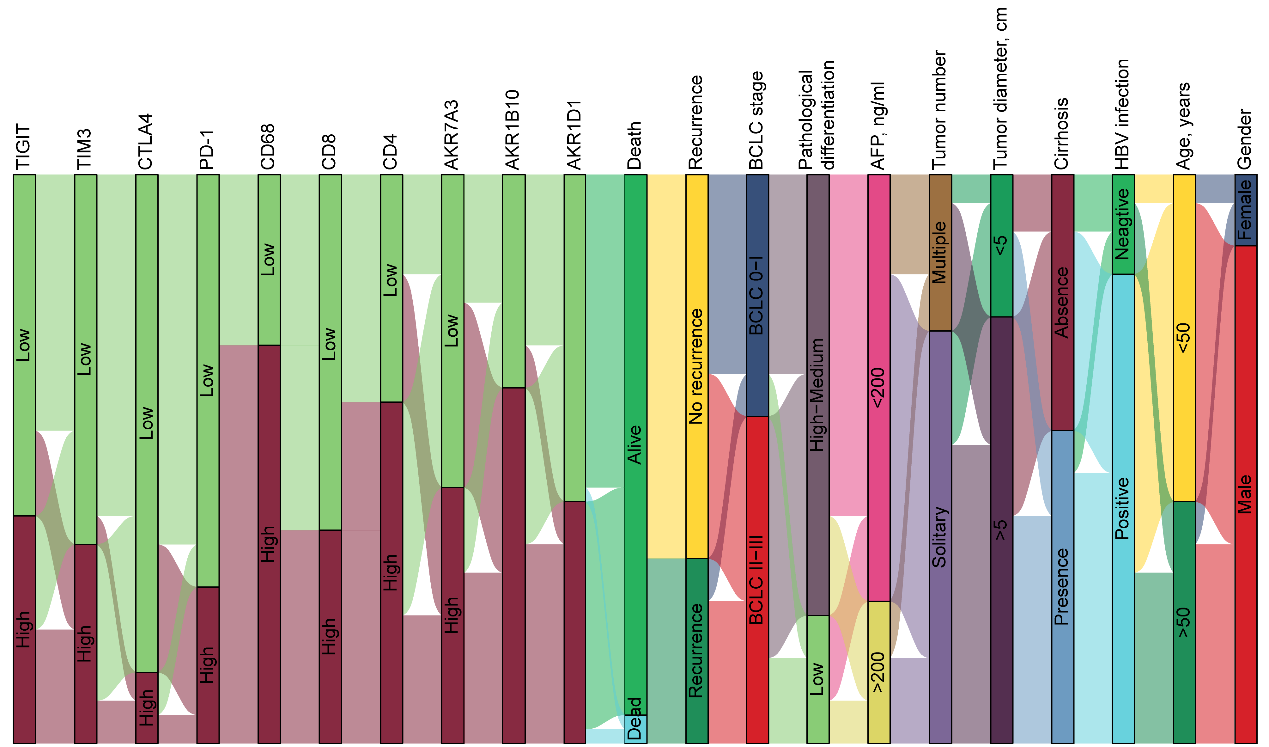

Supplement: Supplementary file 1 [file get_supplementary_file.php]
